# Supplementary material for: Diversity of Culturable Bacteria from Endemic Medicinal Plants of the Highlands of the Province of Parinacota, Chile
Source: MDPI journal article supplement (doi:10.3390/biology12070920), 2023-06-27
Supplement: s1 [file s1]

Table S2. Accession number of retrieved sequences from GenBank for phylogenetic analysis

| Reference strain                               | GenBank accession number |
|------------------------------------------------|--------------------------|
| <i>Aquifex pyrophilus</i> Kol5a                | NR_029172.1              |
| <i>Leifsonia soli</i> TG-S248                  | NR_116501.1              |
| <i>Leifsonia lichenia</i> 2Sb                  | NR_112644.1              |
| <i>Leifsonia shinshuensis</i> DB 102           | NR_043663.1              |
| <i>Microbacterium hydrocarbonoxydans</i> BNP48 | NR_042263.1              |
| <i>Arthrobacter pascens</i> DSM 20545          | NR_026191.1              |
| <i>Arthrobacter humicola</i> KV-653            | NR_041546.1              |
| <i>Arthrobacter oryzae</i> KV-651              | NR_041545.1              |
| <i>Ureibacillus massiliensis</i> 4400831       | NR_043092.1              |
| <i>Ureibacillus sinduriensis</i> BLB-1         | NR_116552.1              |
| <i>Ureibacillus chungkukjangi</i> 2RL3-2       | NR_109669.1              |
| <i>Cytobacillus firmus</i> NBRC 15306          | NR_112635.1              |
| <i>Cytobacillus oceanisediminis</i> H2         | NR_117285.1              |
| <i>Rhodococcus globerulus</i> DSM 43954        | NR_026184.1              |
| <i>Rhodococcus erythropolis</i> N11            | NR_037024.1              |
| <i>Rhodococcus qingshengii</i> CCM 4446        | NR_145886.1              |
| <i>Priestia paraflexa</i> RC2 16S              | NR_135732.1              |
| <i>Priestia megaterium</i> NBRC 15308          | NR_112636.1              |
| <i>Priestia flexa</i> NBRC 15715               | NR_113800.1              |
| <i>Micrococcus endophyticus</i> YIM 56238      | NR_044365.1              |
| <i>Micrococcus aloeverae</i> AE-6              | NR_134088.1              |
| <i>Micrococcus luteus</i> NCTC 2665            | NR_075062.2              |
| <i>Micrococcus yunnanensis</i> YIM 65004       | NR_116578.1              |
| <i>Candidimonas humi</i> SC-092                | NR_117011.1              |
| <i>Candidimonas nitroreducens</i> SC-089       | NR_117010.1              |
| <i>Candidimonas bauzanensis</i> BZ59           | NR_108569.1              |
| <i>Microbacterium maritopicum</i> DSM 12512    | NR_042351.1              |
| <i>Microbacterium oxydans</i> DSM 20578        | NR_044931.1              |
| <i>Staphylococcus caprae</i> ATCC 35538        | NR_024665.1              |
| <i>Staphylococcus capitis</i> MAW 8436         | NR_027519.1              |
| <i>Staphylococcus epidermidis</i> Fussel       | NR_036904.1              |
| <i>Pseudarthrobacter oxydans</i> DSM 20119     | NR_026236.1              |
| <i>Pseudarthrobacter psychrotolerans</i> YJ56  | NR_174315.1              |
| <i>Pseudarthrobacter siccitolerans</i> 4J27    | NR_108849.1              |
| <i>Pseudarthrobacter niigatensis</i> LC4       | NR_041400.1              |
| <i>Pseudarthrobacter equi</i> IMMIB L-1606     | NR_117032.1              |
| <i>Pseudarthrobacter defluvii</i> 4C1-a        | NR_042573.1              |
| <i>Advenella incenata</i> CCUG 45225           | NR_042702.1              |
| <i>Advenella mimigardefordensis</i> DPN7       | NR_121716.1              |
| <i>Advenella kashmirensis</i> PK1              | NR_146816.1              |
| <i>Stenotrophomonas pavanii</i> LMG 25348      | NR_118008.1              |

|                                                   |             |
|---------------------------------------------------|-------------|
| <i>Stenotrophomonas tumulicola</i> T5916-2-1b     | NR_148818.1 |
| <i>Stenotrophomonas maltophilia</i> ATCC 13637    | NR_112030.1 |
| <i>Paenarthrobacter aurescens</i> DSM 20116       | NR_026233.1 |
| <i>Paenarthrobacter nitroguajacolicus</i> G2-1    | NR_027199.1 |
| <i>Paenarthrobacter histidinovorans</i> DSM 20115 | NR_026234.1 |
| <i>Paenarthrobacter nicotinovorans</i> DSM 420    | NR_026194.1 |
| <i>Pseudomonas gessardii</i> CIP 105469           | NR_024928.1 |
| <i>Pseudomonas paralactis</i> DSM 29164           | NR_156987.1 |
| <i>Pseudomonas azotoformans</i> NBRC 12693        | NR_113600.1 |
| <i>Pseudomonas lactis</i> DSM 29167               | NR_156986.1 |
| <i>Bacillus safensis</i> NBRC 100820              | NR_113945.1 |
| <i>Bacillus australimaris</i> MCCC 1A05787        | NR_148787.1 |
| <i>Bacillus zhangzhouensis</i> MCCC 1A08372       | NR_148786.1 |
| <i>Bacillus pumilus</i> ATCC 7061                 | NR_043242.1 |
| <i>Microbacterium ginsengiterrae</i> DCY37        | NR_116483.1 |
| <i>Microbacterium foliorum</i> P 333/02           | NR_025368.1 |
| <i>Microbacterium murale</i> 01-Gi-001            | NR_117603.1 |
| <i>Microbacterium phyllosphaerae</i> P 369/06     | NR_025405.1 |
| <i>Microbacterium profundum</i> Shh49             | NR_044321.1 |
