# Supplementary material for: Diversity of Culturable Bacteria from Endemic Medicinal Plants of the Highlands of the Province of Parinacota, Chile
Source: MDPI journal article supplement (doi:10.3390/biology12070920), 2023-06-27
Supplement: s1 [file s1]

Supplementary Material (Moraga et al., 2023)

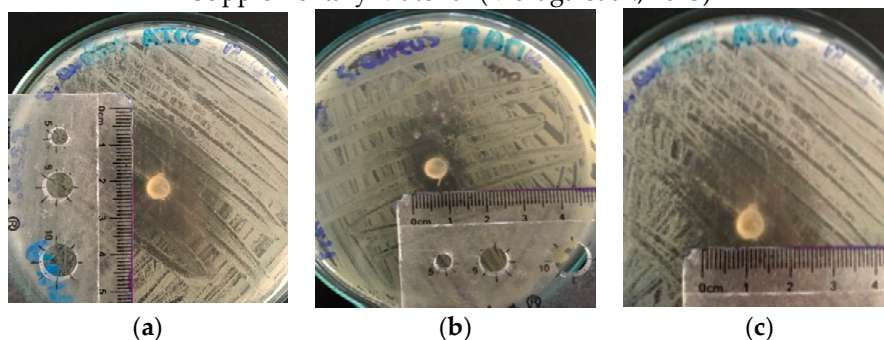

**Figure S1.** Agar diffusion antibacterial activity of K64 strain. The K64 strain was grown in BHI and 20  $\mu$ L of supernatants cell free was used to test the antibacterial activity against antibiotic resistant *S. aureus*. **(a)** Inhibition halo observed on Clindamycin resistant *S. aureus* (IZD of 24,2 mm). **(b)** Inhibition halo observed on Methicillin resistant *S. aureus* (IZD of 12.4 mm). **(c)** Inhibition halo on *S. aureus* ATCC 25923 (IZD of 27 mm), used as a control of assay. The plates were incubated by 48 h.
