# Supplementary material for: Diversity of Culturable Bacteria from Endemic Medicinal Plants of the Highlands of the Province of Parinacota, Chile
Source: Biology (Basel). 2023 Jun 27;12(7):920. doi: 10.3390/biology12070920 (PMC10376134; doi:10.3390/biology12070920)
Supplement: Supplementary file 1 [file biology-12-00920-s001.zip › Table S1.xlsx]

## Sheet: Hoja1
	Isolate	Plant sample	Sampling site	Genbank accession number	Sequence length (bp)	Nearest phylogenetic relative in GenBank	Identity (%)	Phylum	Class	Protease	Lipase	Cellulase	Amylase	Auxin production	Siderophores production	N2 fixation	Phosphate solubilization	Botrytis cinerea*	Fusarium oxysporum*	Geotrichum candidum*	Phytium sp.*	Macrophomina phaseolina*	Monilinia fructicola*
	K4	Noatola (Parastrephia lucida)	Taapaca Volcano	OQ225692	1351	Paenarthrobacter nicotinovorans	99.19	Actinomycetota	Actinomycetia	-	-	-	+	+	-	+	+	-	-	-	-	-	-
	K5	Noatola (Parastrephia lucida)	Taapaca Volcano	OQ225693	1377	Paenarthrobacter nicotinovorans	98.62	Actinomycetota	Actinomycetia	-	-	-	+	+	-	-	+	-	-	-	-	-	-
	K14	Sallika (Rosmarinus officinalis)	Putre	OQ225694	1364	Stenotrophomonas maltophilia	98.83	Pseudomonadota	Gammaproteobacteria	+	+	-	-	-	-	-	-	-	-	-	-	-	-
	K15	Sallika (Rosmarinus officinalis)	Putre	OQ225695	1365	Bacillus safensis	99.49	Bacillota	Bacilli	+	+	+	-	-	+	-	+	-	-	-	-	-	-
	K18	Chachacoma (Senecio nutans)	Taapaca Volcano	OQ225696	1383	Advenella kashmirensis	99.64	Pseudomonadota	Betaproteobacteria	-	-	-	-	-	-	+	+	-	-	-	-	-	-
	K20	Chachacoma (Senecio nutans)	Taapaca Volcano	OQ225697	1348	Bacillus safensis	99.85	Bacillota	Bacilli	+	-	+	-	-	+	-	+	-	-	-	-	-	-
	K21	Chachacoma (Senecio nutans)	Taapaca Volcano	N.S.	1427	Bacillus safensis	100	Bacillota	Bacilli	+	+	+	-	-	-	-	+	-	-	-	-	-	-
	K22	Jakana (Xenophyllum lycopodioides)	Taapaca Volcano	OQ225698	1373	Pseudarthrobacter defluvii	99.12	Actinomycetota	Actinomycetia	+	-	-	+	-	-	+	-	-	-	-	-	-	-
	K23	Jakana (Xenophyllum lycopodioides)	Taapaca Volcano	OQ225699	1354	Pseudarthrobacter defluvii	99.11	Actinomycetota	Actinomycetia	+	-	-	+	-	-	+	-	-	-	-	-	-	-
	K27	Ñacatola (Baccharis boliviensis)	Putre	OQ225700	1347	Pseudarthrobacter siccitolerans	98.89	Actinomycetota	Actinomycetia	+	-	-	+	-	-	+	-	-	-	-	-	-	-
	K28'	Ñacatola (Baccharis boliviensis)	Putre	OQ225701	1415	Staphylococcus epidermidis	100	Bacillota	Bacilli	+	+	-	-	-	+	-	-	-	-	-	-	-	-
	K29	Ñacatola (Baccharis boliviensis)	Putre	OQ225702	1370	Paenarthrobacter nicotinovorans	99.05	Actinomycetota	Actinomycetia	+	-	+	-	-	-	-	+	-	-	-	-	+	+
	K29'	Ñacatola (Baccharis boliviensis)	Putre	OQ225703	1371	Bacillus pumilus	99.78	Bacillota	Bacilli	+	-	+	-	-	+	-	+	-	-	-	-	+	+
	K44	Purapura (Xenophyllum poposum)	Taapaca Volcano	OQ225704	1341	Pseudarthrobacter equi	99.48	Actinomycetota	Actinomycetia	+	-	-	+	-	-	+	+	-	-	-	-	-	-
	K45	Purapura (Xenophyllum poposum)	Taapaca Volcano	N.S.	1100	Pseudarthrobacter siccitolerans	92.1	Actinomycetota	Actinomycetia	-	-	+	+	-	-	-	-	-	-	-	-	-	-
	K46	Purapura (Xenophyllum poposum)	Taapaca Volcano	OQ225705	1333	Micrococcus yunnanensis	99.85	Actinomycetota	Actinomycetia	+	-	-	+	-	-	-	+	-	-	-	-	-	-
	K47	Purapura (Xenophyllum poposum)	Taapaca Volcano	OQ225706	1358	Rhodococcus qingshengii	100	Actinomycetota	Actinomycetia	-	+	+	-	-	-	-	+	-	-	-	-	-	-
	K52	Sallika (Rosmarinus officinalis)	Putre	OQ225707	1339	Paenarthrobacter nitroguajacolicus	99.85	Actinomycetota	Actinomycetia	+	-	-	-	+	-	+	+	-	+	-	-	-	-
	K54	Sallika (Rosmarinus officinalis)	Putre	OQ225708	1361	Microbacterium oxydans	99.78	Actinomycetota	Actinomycetia	-	-	-	+	-	+	-	+	-	-	-	-	-	-
	K55	Sallika (Rosmarinus officinalis)	Putre	OQ225709	1391	Microbacterium profundi	98.85	Actinomycetota	Actinomycetia	-	-	-	+	-	+	-	-	-	-	-	-	-	-
	K56	Purapura (Xenophyllum poposum)	Taapaca Volcano	OQ225710	1400	Microbacterium hydrocarbonoxydans	92.63	Actinomycetota	Actinomycetia	-	-	-	+	-	+	-	+	-	-	-	-	-	-
	K57	Purapura (Xenophyllum poposum)	Taapaca Volcano	OQ225711	1357	Microbacterium oxydans	99.71	Actinomycetota	Actinomycetia	-	-	-	+	-	+	+	-	+	-	-	-	-	-
	K59	Purapura (Xenophyllum poposum)	Taapaca Volcano	OQ225712	1361	Leifsonia shinshuensis	99.34	Actinomycetota	Actinomycetia	-	-	-	+	-	+	+	+	-	-	-	-	-	-
	K59'	Purapura (Xenophyllum poposum)	Taapaca Volcano	OQ225713	1384	Bacillus pumilus	100	Bacillota	Bacilli	+	-	+	-	-	-	-	+	-	-	-	-	-	-
	K60'	Purapura (Xenophyllum poposum)	Taapaca Volcano	OQ225714	1365	Bacillus pumilus	99.85	Bacillota	Bacilli	+	-	+	-	-	+	-	+	-	-	-	-	+	+
	K62	Yara (Dunalia spinosa)	Putre	OQ225715	702	Bacillus zhangzhouensis	99.86	Bacillota	Bacilli	+	-	+	-	-	+	-	+	-	-	-	-	+	+
	K64	Yara (Dunalia spinosa)	Putre	OQ225716	1417	Bacillus pumilus	97.41	Bacillota	Bacilli	+	+	+	-	-	+	-	+	-	-	-	-	+	+
	K68	Jakana (Xenophyllum lycopodioides)	Taapaca Volcano	OQ225717	1361	Pseudomonas lactis	99.71	Pseudomonadota	Gammaproteobacteria	+	+	-	+	-	+	-	+	-	-	-	-	-	-
	K101	Noatola (Parastrephia lucida)	Taapaca Volcano	OQ225718	1404	Ureibacillus chungkukjangi	100	Bacillota	Bacilli	+	-	-	+	-	-	-	+	-	-	-	-	-	-
	K102	Noatola (Parastrephia lucida)	Taapaca Volcano	OQ225719	1361	Bacillus pumilus	99.93	Bacillota	Bacilli	+	-	-	-	-	+	-	+	-	-	-	-	+	+
	K103	Ñacatola (Baccharis boliviensis)	Putre	N.S.	1110	Priestia flexa	90.51	Bacillota	Bacilli	+	-	+	+	-	-	-	+	-	-	-	-	-	-
	K104	Ñacatola (Baccharis boliviensis)	Putre	OQ225720	1332	Cytobacillus oceanisediminis	99.55	Bacillota	Bacilli	-	-	-	+	-	-	-	-	-	-	-	-	-	-
	K105	Ñacatola (Baccharis boliviensis)	Putre	OQ225721	1374	Cytobacillus oceanisediminis	99.64	Bacillota	Bacilli	+	+	-	+	-	-	-	-	-	-	-	-	-	-
	K106	Ñacatola (Baccharis boliviensis)	Putre	OQ225722	864	Bacillus zhangzhouensis	98.84	Bacillota	Bacilli	+	-	+	-	-	-	-	+	-	-	-	-	-	-
	K107	Ñacatola (Baccharis boliviensis)	Putre	OQ225723	1342	Arthrobacter oryzae	99.48	Actinomycetota	Actinomycetia	+	-	-	+	-	-	-	+	-	-	-	-	-	-
	K109	Ñacatola (Baccharis boliviensis)	Putre	OQ225724	1406	Priestia flexa	99.86	Bacillota	Bacilli	+	-	-	+	-	-	-	+	-	-	-	-	-	-
	K110	Ñacatola (Baccharis boliviensis)	Putre	OQ225725	1382	Candidimonas bauzanensis	98.48	Pseudomonadota	Betaproteobacteria	+	-	-	+	-	-	-	-	-	-	-	-	-	-
	K111	Siputula (Paratrephia quadrangularis)	Taapaca Volcano	OQ225726	1360	Micrococcus yunnanensis	100	Actinomycetota	Actinomycetia	+	+	-	+	+	-	-	-	-	-	-	-	-	-
	K113	Siputula (Paratrephia quadrangularis)	Taapaca Volcano	OQ225727	1403	Priestia flexa	100	Bacillota	Bacilli	+	-	-	-	-	-	-	-	-	-	-	-	-	-
	N.S. Non submitted sequence
	*Biocontrol activity against phytopathogenic fungus
